# Supplementary material for: How good are clinicians in predicting the presence of Pseudomonas spp. in diabetic foot infections? A prospective clinical evaluation
Source: PubMed Central journal article supplement (PMC8029573; doi:10.1002/edm2.225), 2021-02-09
Supplement: EDM2-4-e00225-s001.pdf [file EDM2-4-e00225-s001.pdf]

# Introduction

**Diabetic Foot Infections (DFI): pivotal event leading to lower extremity amputation**

***Pseudomonas* spp:**

- Virulent pathogen, strong biofilm
- Frequent in nosocomial infections
- Resistant to standard antibiotics used as first – line therapy for DFI
- May become rapidly resistant during therapy
- "Recognizable": green colour, grape juice – like smell, skin maceration ?

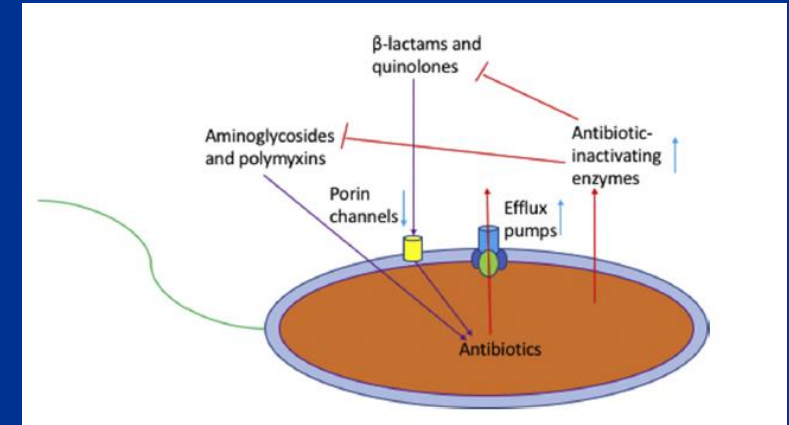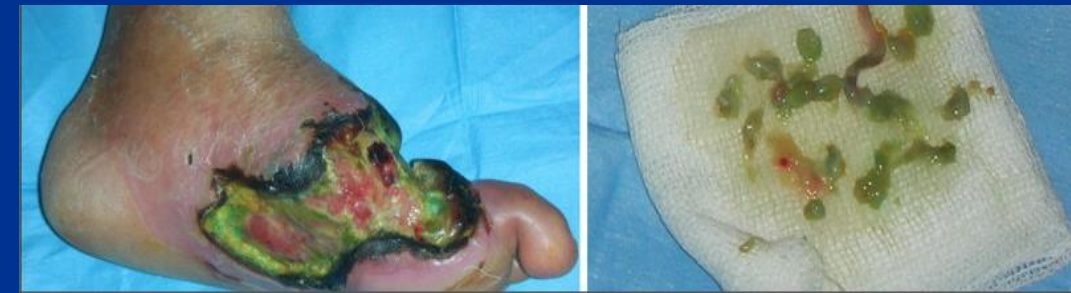

Prompers et al. Diabetologia 2008

Uckay et al. Diabetes, Obesity and Metabolism 2014

Pang et al. Biotechnology Advances 2019

| First author<br>[Reference] | Country      | Year | Types of<br>wounds | No. of<br>patients | Percentage of isolates from wound culture |              |                   |                   |                       |           |
|-----------------------------|--------------|------|--------------------|--------------------|-------------------------------------------|--------------|-------------------|-------------------|-----------------------|-----------|
|                             |              |      |                    |                    | Staphylococci                             | Streptococci | Gram-<br>positive | Gram-<br>negative | <i>Ps. aeruginosa</i> | Anaerobes |
| Carvalho [109]              | Brazil       | 2003 | Infections         | 141                | 20                                        | 4            | 29                | 59                | 7                     | 12        |
| Candel [110]                | Spain        | 2003 | Infections         | 27                 | 49                                        | 15           | 78                | 22                | 1                     | 2         |
| Anandi [111]                | India        | 2004 | Infections         | 107                | 14                                        | —            | —                 | —                 | —                     | 4         |
| Unachukwu [112]             | Nigeria      | 2005 | Gangrene           | 60                 | 56                                        | —            | —                 | —                 | —                     | —         |
| Senneville [113]            | France       | 2005 | Bone               | 76                 | 52                                        | 12           | —                 | 18                | 2                     | 5         |
| Abdulrazak [114]            | Kuwait       | 2005 | Infections         | 86                 | 38                                        | 17           | 74                | 26                | 18                    | 11        |
| Shankar [115]               | India        | 2005 | Infections         | 77                 | —                                         | 3            | 42                | 58                | 30                    | 6         |
| Yoga [116]                  | Malaysia     | 2006 | Infections         | 44                 | 20                                        | —            | —                 | —                 | 14                    | —         |
| Gadepalli [72]              | India        | 2006 | Ulcers             | 80                 | 20                                        | 0            | 33                | 51                | 10                    | 15        |
| Sharma [117]                | Nepal        | 2006 | Ulcers             | —                  | 38                                        | —            | —                 | —                 | 18                    | —         |
| Örmen [118]                 | Turkey       | 2007 | Bone               | 50                 | —                                         | —            | 40                | 60                | —                     | —         |
| Raja [119]                  | Malaysia     | 2007 | Infections         | 194                | 44                                        | 25           | 45                | 52                | 25                    | —         |
| Çetin [120]                 | Turkey       | 2007 | Infections         | 65                 | 18                                        | 6            | 59                | 41                | 8                     | 3         |
| Dowd [121]                  | USA          | 2008 | Ulcers             | 40                 | 8                                         | 37           | —                 | —                 | 15                    | 18        |
| Umadevi [122]               | India        | 2008 | Infections         | 105                | 17                                        | 0            | 29                | 71                | 17                    | 0         |
| Khoharo [123]               | Pakistan     | 2009 | Infections         | 60                 | 20                                        | 3            | 27                | 73                | 48                    | 2         |
| Ramakant [35]               | India        | 2010 | Ulcers             | 447                | 19                                        | 3            | 31                | 57                | 17                    | 1         |
| Zubair [124]                | India        | 2010 | Infections         | 60                 | 31                                        | 0            | 38                | 62                | 11                    | 0         |
| Özer [43]                   | Turkey       | 2010 | Infections         | 78                 | 17                                        | 7            | 38                | 56                | 19                    | —         |
| Mendes [125]                | Portugal     | 2011 | Infections         | 49                 | 84                                        | 4            | 85                | 19                | 1                     | 14        |
| Hayat [126]                 | Pakistan     | 2011 | Infections         | 85                 | 18                                        | 5            | 27                | 68                | 27                    | 2         |
| Pappu [127]                 | India        | 2011 | Infections         | 104                | 21                                        | 4            | —                 | >67               | 23                    | 0         |
| Malone [128]                | Saudi-Arabia | 2011 | Toe bone           | 34                 | 33                                        | 9            | 57                | 29                | 9                     | 0         |
| Aziz [129]                  | Singapore    | 2011 | Infections         | 100                | 40                                        | 21           | —                 | —                 | 26                    | 30        |
| Dezfulian [138]             | Iran         | 2011 | Infections         | 69                 | 43                                        | 5            | 55                | 45                | 6                     | 5         |
| Aamir [36]                  | Pakistan     | 2011 | Wounds             | 114                | 55                                        | 5            | —                 | —                 | 4                     | —         |
| Tiwari [130]                | India        | 2012 | Infections         | 62                 | —                                         | —            | 32                | 68                | —                     | —         |
| Swarna [131]                | India        | 2012 | Infections         | 62                 | 30                                        | 0            | 44                | 56                | 20                    | 0         |
| Patel [132]                 | India        | 2012 | Infections         | 55                 | 7                                         | —            | 24                | 65                | 2                     | —         |

# Study Purpose and Design

---

To investigate the capacity of experienced clinical workers to predict *Pseudomonas* spp. involvement in infected foot ulcers based on typical clinical findings (green color, specific smell, skin maceration ?)

Prospective observational pilot study

# Interim Results

## Growth of *Pseudomonas* in 13 cases (15.2%)

- 7 bone samples (8.2%)
- 4 mono – infections
- 9 co - infections

## Clinicians predicted *Pseudomonas*:

- Correctly in 5 cases
- Wrongly in 13 cases
- Missed it in 8 cases

|                                  | Overall: | Surgeons: |
|----------------------------------|----------|-----------|
| <b>Sensitivity</b>               | 0.38     | 0.50      |
| <b>Specificity</b>               | 0.83     | 0.94      |
| <b>Positive predictive value</b> | 0.29     | 0.75      |
| <b>Negative predictive value</b> | 0.88     | 0.84      |

# Conclusion

---

**The predictive capacity for *Pseudomonas* spp. according to visual and olfactory characteristics in DFI was moderate even among experienced clinicians**

**Better specificity than sensitivity**

**Effect of awareness / training (restitution) over time, the role of the Gram-staining and performance of wound nurses need to be further elucidated**

**Microbiology is still necessary**
